# Supplementary material for: GMIE: a global maximum irrigation extent and central pivot irrigation system dataset derived via irrigation performance during drought stress and deep learning methods
Source: Copernicus journal article supplement (doi:10.5194/essd-17-855-2025), 2025-03-06
Supplement: Supplementary file 1 [file essd-17-855-2025-supplement.zip]

# ***Supplementary Materials of GMIE: a global maximum irrigation extent and central pivot irrigation system dataset derived via irrigation performance during drought stress and deep learning methods***

Fuyou Tian<sup>1</sup>, Bingfang Wu<sup>1,2, \*</sup>, Hongwei Zeng<sup>1,2</sup>, Miao Zhang<sup>1</sup>, Weiwei Zhu<sup>1</sup>, Nana Yan<sup>1</sup>, Yuming Lu<sup>1,2</sup> Yifan Li<sup>3,1</sup>

<sup>1</sup>State Key Laboratory of Remote Sensing Science, Aerospace Information Research Institute, Chinese Academy of Sciences, Beijing 100101, China;

<sup>2</sup>University of Chinese Academy of Sciences, Beijing 100049, China;

<sup>3</sup>School of Computer Science, China University of Geosciences, Wuhan 430078, China

*Correspondence to:* Bingfang Wu (wubf@aircas.ac.cn)

## **1. Cropland mask used in this study**

Due to lack to consistent and high-accuracy cropland mask, which is crucial for detect irrigated and rainfed cropland we used synthesized cropland mask integrating 10 existing land cover maps or cropland datasets to delimit the global cropland extent while masking out irrelevant non-cropland pixels for the period of 2016–2018. The detail information for the source of cropland mask can be found in Table S1 and Figure S1. This data was used for supporting crop intensity mapping (Zhang et al., 2021).

Although variations in classification systems among different products exist, a subset of classes of those land cover and cropland layer products were selected to best fit into the cropland definition (Table S1). Spatially, FROM-GLC was selected for Europe, Africa, New Zealand, the majority of Asia, and part of Latin America. GFSAD30 was selected for tropical Asian islands, including Indonesia, Malaysia, and the Philippines (Figure S1). In addition to these two global-coverage cropland extent products, several national or regional datasets, including ChinaCover, CDL, AAFC ACI, NLCD, MapBiomass, CLUM, SERVIR, and INTA, were used because they have been extensively validated by local experts and hence exhibited high accuracies of cropland mapping.

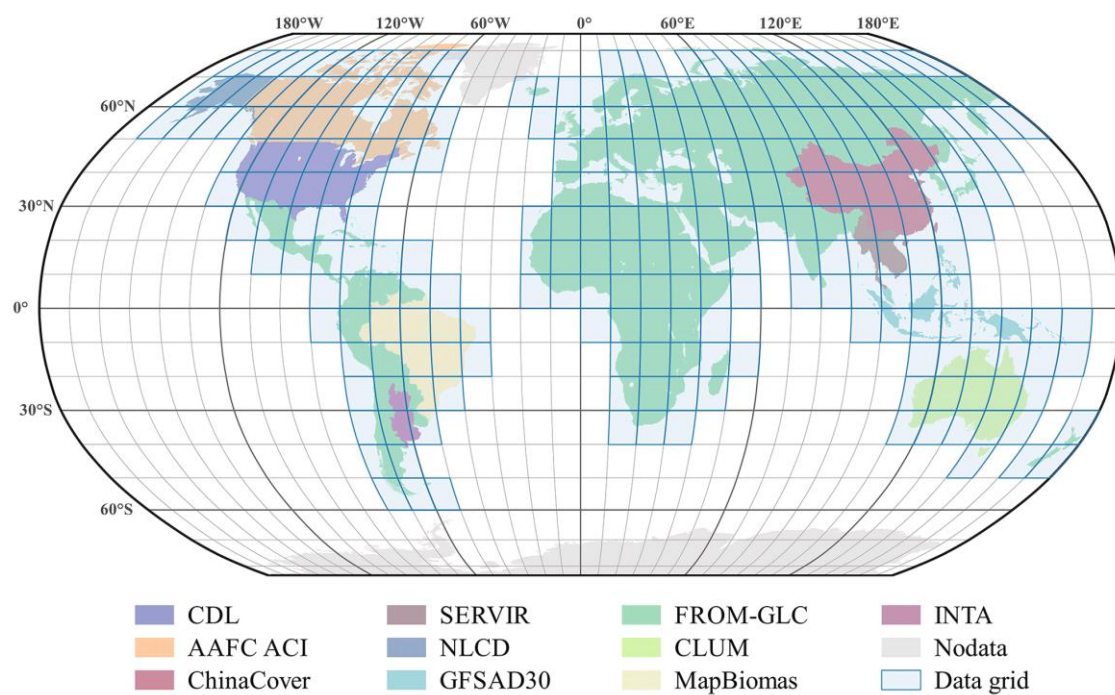

Figure S1 Spatial distribution of the land cover/cropland layer products used for the global 30-m cropland (Zhang et.al 2021 ESSD)

Table S1. Cropland and land cover datasets used for the study

| Region        | Dataset name                                                                                              | Year    | Selected classes                                                                         | Resolution | Accuracy | Reference                                         |
|---------------|-----------------------------------------------------------------------------------------------------------|---------|------------------------------------------------------------------------------------------|------------|----------|---------------------------------------------------|
| Argentina     | Crop type map                                                                                             | 2018-19 |                                                                                          | 30         | 81%      | (De Abelleira Diego, 2019)                        |
| Australia     | Catchment Scale Land Use of Australia                                                                     | 2018    | Cropping, Seasonal horticulture, Irrigated cropping, and Irrigated seasonal horticulture | 50         | 92%      | (Calderón-Loor et al., 2021)                      |
| Brazil        | MapBiomass                                                                                                |         |                                                                                          | 30         |          | Project MapBiomass, 2019* (Do Canto et al., 2020) |
| Bhutan        | Land cover data of Bhutan                                                                                 | 2010    | Agriculture                                                                              | 30         |          | ICIMOD, 2011 (Uddin et al., 2015)                 |
| Canada        | Canada AAFC Annual Crop Inventory data                                                                    | 2009    | Seasonal crops and greenhouse                                                            | 30         | 85%      | (McNairn, H,2009) (McNairn et al., 2009)          |
| China         | ChinaCover                                                                                                | 2015    | Upland and rice field                                                                    | 30         | 86%      | (Wu et al., 2017; Wu et al., 2024)                |
| Mozambique    | ChinaCover                                                                                                | 2018    |                                                                                          | 10         | 85%      | (Bofana et al., 2020)                             |
| Nepal         | National landcover for Nepal                                                                              | 2010    | Agriculture area                                                                         | 30         |          | (Uddin et al., 2015)                              |
| New Zealand   | New Zealand Land Cover                                                                                    | 2012    | Short-rotation cropland                                                                  | 30         |          | NZLRI, 2015                                       |
| United States | CDL                                                                                                       | 2009    | Class 1~56 and Class 225~254                                                             | 30         | 85%-95%  | (Boryan et al., 2011),                            |
| Zambia        | ChinaCover                                                                                                | 2018    |                                                                                          | 10         | 0.87     | (Bofana et al., 2020)                             |
| Zimbabwe      | ChinaCover                                                                                                | 2018    |                                                                                          | 10         | 0.86     | (Bofana et al., 2020)                             |
| Europe        | CORINE land cover                                                                                         | 2018    |                                                                                          |            |          | (Büttner et al., 2017)                            |
| Central Asia  | CA Landcover                                                                                              | 2015    |                                                                                          | 30         |          | CASEarth                                          |
| Africa        | FROM-GLC-Africa30                                                                                         | 2015    |                                                                                          |            |          | (Liu et al., 2021)                                |
| Lower Mekong  | SERVIR-Mekong Land Cover                                                                                  | 2018    | Cropland and Rice                                                                        | 30         | 0.94     | (Saah et al., 2020)                               |
| Global        | FORM-GLC 2015                                                                                             | 2015    |                                                                                          | 30         |          | **                                                |
| Global        | GFSAD30                                                                                                   | 2015    |                                                                                          | 30         |          | ***                                               |
| *             | <a href="https://plataforma.mapbiomas.org/map#coverage">https://plataforma.mapbiomas.org/map#coverage</a> |         |                                                                                          |            |          |                                                   |

|     |                                                                                                                                                                                 |
|-----|---------------------------------------------------------------------------------------------------------------------------------------------------------------------------------|
| **  | <a href="http://www.chinageoss.org/tansat/pdf/FROM-GLC.pdf">http://www.chinageoss.org/tansat/pdf/FROM-GLC.pdf</a>                                                               |
| *** | <a href="https://lpdaac.usgs.gov/news/release-of-gfsad-30-meter-cropland-extent-products/">https://lpdaac.usgs.gov/news/release-of-gfsad-30-meter-cropland-extent-products/</a> |

Bofana, J., Zhang, M., Nabil, M., Wu, B., Tian, F., Liu, W., Zeng, H., Zhang, N., Nangombe, S. S., and Cipriano, S. A.: Comparison of different cropland classification methods under diversified agroecological conditions in the zambezi river basin, *Remote Sensing*, 12, 2096, 2020.

Boryan, C., Yang, Z., Mueller, R., and Craig, M.: Monitoring US agriculture: the US department of agriculture, national agricultural statistics service, cropland data layer program, *Geocart. Internat.*, 26, 341–358, 2011.

Büttner, G., Kosztra, B., Soukup, T., Sousa, A., and Langanke, T.: CLC2018 technical guidelines, European Environment Agency, Wien, 2017.

Calderón-Loor, M., Hadjikakou, M., and Bryan, B. A.: High-resolution wall-to-wall land-cover mapping and land change assessment for Australia from 1985 to 2015, *Remote Sens. Environ.*, 252, 112148, 2021.

Mapa Nacional de Cultivos campaña 2018/2019: [https://inta.gob.ar/sites/default/files/mapa\\_nacional\\_de\\_cultivos\\_campana\\_2018\\_2019.pdf](https://inta.gob.ar/sites/default/files/mapa_nacional_de_cultivos_campana_2018_2019.pdf), last

do Canto, A. C. B., Marques, R., Leite, F. F. G. D., da SILVEIRA, J., DONAGEMMA, G., and RODRIGUES, R.: Land use and cover maps for Mato Grosso from 1985 to 2019,

Liu, L., Zhang, X., Gao, Y., Chen, X., Shuai, X., and Mi, J.: Finer-resolution mapping of global land cover: Recent developments, consistency analysis, and prospects, *Journal of Remote Sensing*, 2021.

McNairn, H., Champagne, C., Shang, J., Holmstrom, D., and Reichert, G.: Integration of optical and Synthetic Aperture Radar (SAR) imagery for delivering operational annual crop inventories, *Int. J. Photogramm. Remote Sens.*, 64, 434–449, 10.1016/j.isprsjprs.2008.07.006, 2009.

Saah, D., Tenneson, K., Poortinga, A., Nguyen, Q., Chishtie, F., San Aung, K., Markert, K. N., Clinton, N., Anderson, E. R., and Cutter, P.: Primitives as building blocks for constructing land cover maps, *International Journal of Applied Earth Observation and Geoinformation*, 85, 101979, 2020.

Uddin, K., Shrestha, H. L., Murthy, M., Bajracharya, B., Shrestha, B., Gilani, H., Pradhan, S., and Dangol, B.: Development of 2010 national land cover database for the Nepal, *J. Environ. Manag.*, 148, 82–90, 2015.

Wu, B., Fu, Z., Fu, B., Yan, C., Zeng, H., and Zhao, W.: Dynamics of land cover changes and driving forces in China's drylands since the 1970 s, *Land Use Policy*, 140, 107097, 10.1016/j.landusepol.2024.107097, 2024.

Wu, B., Qian, J., Zeng, Y., Zhang, L., Yan, C., Wang, Z., Li, A., Ma, R., Yu, X., and Huang, J.: Land Cover Atlas of the People's Republic of China (1: 1 000 000), *Science Bulletin*, 65, 1125–1136, 2017.

Zhang, M., Wu, B., Zeng, H., He, G., Liu, C., Tao, S., Zhang, Q., Nabil, M., Tian, F., Bofana, J., Beyene, A. N., Elnashar, A., Yan, N., Wang, Z., and Liu, Y.: GCI30: a global dataset of 30m cropping intensity using multisource remote sensing imagery, *Earth Syst. Sci. Data*, 13, 4799–4817, 10.5194/essd-13-4799-2021, 2021.



## 2. Field survey method for irrigation and rainfed samples

Although it is not easy to identify irrigated cropland on satellite data, irrigation cropland could be identified accurate in field according to irrigation infrastructure, crop type and crop health condition. Even you cannot distinguish them following above characteristics, you could ask local farmer, who will answer this question with hesitate.

- Irrigation infrastructure, some obvious feature was easy to identify, such as canner, irrigation pump and central pivot irrigation system. We display serval photos for this case as below:

|                                                                                     |                                                                                      |
|-------------------------------------------------------------------------------------|--------------------------------------------------------------------------------------|
|   |   |
| Irrigation cannel in Xinjiang                                                       | Drip irrigation in Hebei province                                                    |
|  |  |
| Irrigation pump                                                                     | Central pivot irrigation system                                                      |

- Usually, irrigated was applied for certain crop types, such as winter wheat in North China Plain, Cotton in Xinjiang and vegetable and tomatoes in most province, et.al.
- Last but not least, irrigated crops usually appear greener and lush compared with near crops.
