# Supplementary material for: GMIE: a global maximum irrigation extent and central pivot irrigation system dataset derived via irrigation performance during drought stress and deep learning methods
Source: Copernicus journal article supplement (doi:10.5194/essd-17-855-2025), 2025-03-06
Supplement: Supplementary file 2 [file essd-17-855-2025-supplement.zip]

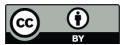

## *Supplement of*

# **GMIE: a global maximum irrigation extent and central pivot irrigation system dataset derived via irrigation performance during drought stress and deep learning methods**

**Fuyou Tian et al.**

*Correspondence to:* Bingfang Wu (wubf@aircas.ac.cn)

- [essd-17-855-2025-supplement-title-page.pdf](#)
- [Supplementary Materials.pdf](#)
- [Supplementary Tables 1022.xls](#)

The copyright of individual parts of the supplement might differ from the article licence.
